# Supplementary material for: No Evidence for a Second Evolutionary Stratum during the Early Evolution of Mammalian Sex Chromosomes
Source: PubMed Central journal article supplement (PMC3477149; doi:10.1371/journal.pone.0045488), 2012-10-19
Supplement: pone.0045488.s001.pdf [file pone.0045488.s001.pdf]

# Figure S1

## A HSFX/Y

```
#Hosa_X1 EASFRPHPD VPGEDNLLSL PFPQKLWRLV SSNQFSSIWW DDSACRVINQ KLFKEILKR DVAHKVFATT SIKSFFRQLN LYGFRKRRQL VSILNK
#Hosa_X2 .....
#Cafa_X .PLLK.LRT. ALAGS...C. ...K.....L N.SR.T.... E.RKSIGLKE ...Q....EW .RPD...E.D CT...I.... ...LS.LCKA .RV...
#Bota_X RRLQDNLP.N PKK.EDI.G. S..R....I. EDAA.T.AC. N.ENMV..EE D..RM...Q. RGMQI.E.D .....ISE.. ..E...IHPG C.AGKM
#Modo_X KR.YFPLTNE SVE.NEFF.. T..R...KI. E.DR.K.V.. NEDS.II.DE .Q.RE...EN KGPCRI.E.D CM...I.... ...S.L.HE ALP.S.
#Hosa_Y1 GSLLS.SYV SEKD.DF... N..R...KI. E.D..K..S. .ENT.I...E E..K...ET KAPYRI.Q.D A...V.... ...S.IQ.E S.V.S.
#Hosa_Y2 GSLLS.SYV SEKD.DF... N..R...KI. E.D..K..S. .ENT.I...E E..K...ET KAPYRI.Q.D A...V.... ...S.IQ.E S.V.S.
#Feca_Y GSLMK..RYV SEKDHDF... T..R...NI. E.D..K... .ENTSI..DE E..K..V.E. KAPFRI.E.G .M..LV...H ....S.M..E ..V.S.
#Eqca_Y GSLIK...HV SDEDNDF... T..R...KIT E..H.K... .ENTSI...E E..KQ.V.EK KAPFRI.G.D NM...V.... ...M.PT ..V.I.
#Mumu_Y RFLIK..PHA SEEDS..F.M T..R...KI. G.DK.K... .EDTYI...E E..K..V.E. KAPFRI.E.D .M..LV.... ...M..G I.ASC.
#Bota_Y DLVIK..CYV SEEVTF... T.....NI. E.D..E.... .ERT.I..HE E..K..V.E. KAPFRI.E.K .M..LI.... ...S.K..N I.L.S.
#Magi_Y RPLIK..RF. .GE.NDF... T..K...KI. E.E..K... .SDT.V..DE E..K..V.E. KGPFRI.E.D CM...I.... ...S.M..E ..V.S.
#Orna GPLVKKRRY. GSDSNDFFAF T..K...KII E.D..Q.... NNDNSI..DE E..K..V.ES KGPFRI.E.D CM...I.... ...S.I.YA ..AM..
```

## B SOX3/SRY

```
#Hosa_Y VKRPMNFIVW SRDQRRKMAL ENPRMRNSEI SKQLGYQWKM LTEAEKWPFQ QEAQKLQAMH RKYPNKYRYP
#Cafa_Y .R.....L.. ..... .Q.Q.... ..... E...R.... ...D....
#Feca_Y .....M. ....V.. ..QTQ..... .....Q..... E...R...L. ....G.R...
#Bota_Y .....ER...V.. ..K.K..D. ....E..R ..D...R... E...R.L.I. ....G....
#Mumu_Y .....M. ..GE.H.L.Q Q..S.Q.T.. ....CR..S .....R... ..R.KIL. ....Q.
#Loaf_Y .....L.. FC..... ..Q..... .L..... .D...L..L E...R.R....
#Smmc_Y .....M. .QT...V.. Q..K.H.... ..VT..L .SDS..R..I D..KR.RDK. KQVSD...Q.
#Maeu_Y .....MI. ..S...V.. ..K.H.... ..H..FT... .PDN..Q..I D..ER.R.K. .EF.D...Q.
#Hosa_X .....M. ..G..... ..K.H.... ..R..AD..L ..D...R..I D..KR.R.V. ME..D....
#Mumu_X .....M. ..G..... ..K.H.... ..R..AD..L ..D...R..I D..KR.R.V. ME..D....
#Cafa_X .....M. ..G..... ..K.H.... ..R..AD..L ..D...R..I D..KR.R.V. ME..D....
#Loaf_X .....M. ..G..... ..K.H.... ..R..AD..L ..D...R..I D..KR.R.V. ME..D....
#Smmc_X .....M. ..G..... ..K.H.... ..R..AD..L ..D...R..I D..KR.R.V. ME..D....
#Modo_X .....M. ..G..... ..K.H.... ..R..AD..L ..D...R..I D..KR.R.V. ME..D....
#Gaga .....M. ..G.....Q ..K.H.... ..R..AD..L .SD...R..I D..KR.R.V. ME..D....
```

# C RBMX/Y

```
#Hosa_YA/C NRETNEKMLK AVFGKHGPIS EVLLIKDRTS KSRGFAFITF ENPADAKNAA KDMNGKSLHG KAIKVEQAKK PSFQSGRRRP PASSRNRSPS GSLRRGRGG
#Hosa_YH .....
#Hosa_YB .....
#Hosa_YF .....
#Hosa_YJ .....T.....S..
#Hosa_YD .....T.....S..
#Hosa_YE .....
#Bota_Y SA..T.ES.E .E...Y.H.V .....N .....S....D... .E...F.D. .T.....N. ...E...QKL QPPA...GHP RN...GS..
#Maeu_Y .VG...D.E S...Y.H.V K...M.Q.N .....V...S..A..D.. R....A.D. .S.....N. ...E...G. .PAP.S.G.P RG...GS.E
#Hosa_X .T....A.E ....Y.R.V ...M...N .....V...S....D... R.....D. ....T...E...G. .PPP.S.G.P RG...GS..
#Maeu_X .T....A.E ....Y.R.V ...M...N .....V...S....D... R.....L.D. .S.....T. .T.E...G. .PPP.S.G.P RG...GS..
#Bota_X .T....A.E ....Y.R.V ...M...N .....V...S....D... R.....D. ....T...E...G. .PPP.S.G.P RG...GS..
#Mumu_X .T....A.E ....Y.R.V ...M...N .....V...S....D... R.....D. ....T...E...GL .PPP.S.G.P RG...GS..
#Cafa_X .T....A.E ....Y.R.V ...M...N .....V...S....D... R.....D. ....T...E...G. .PPP.S.G.P RG...GS..
#Orna .T....A.E ....Y.R.V ...M...N .....V...S....D... R.....D. ....T...E...G. .PPP.S.G.P RG...GS..

#Hosa_YA/C RGWLPHEGHL DDGGYTPDKS YSRGLIPVKR GPSSRSGGPP PKKSAPSAVA RSNSWMSQG PMSRRENYGV PPRRATISSW RNDRMSTRHD GYATNDGHSN
#Hosa_YH .....
#Hosa_YB .....Q.....
#Hosa_YF .....
#Hosa_YJ .....
#Hosa_YD .....Q.....
#Hosa_YE .....Q.....
#Bota_Y ARGRM.G.NF G.N..SLNT. S...PY...K ....CQ..S ..R...VQG ..S.G.RGR. .VL....RG G...QPV..R .DNYV.P.DY ....K.SY.G
#Maeu_Y ARGP.RG.M ..S..SLNNG S.M.PLL... .APPQ..Q.S ..R...GPV Y.SRQ..GR QL.G.DS..G ...ESL..R .DVH..P.D. S.S.KESY.S
#Hosa_X TRGP.RG.M ....SMNN. S..PL.... .PP..... .R...GPV ..S.G..GRA .V.G.DS..G ...EPLP.R .DVYL.P.D. ..S.K.SY.S
#Maeu_X TRGP.RG.M ..S..SLNNG S...PL.... .PP..... .R...GPV ..S.G..GRA .V.G.DS..G ...DPMP.R .DVY..P.D. ..N.K.SY.S
#Bota_X TRGP..G.M ....SMNN. S..PL.... .PP..... .R...GPV ..S.G..GRA .V.G.DS..G ...EPLP.R .DVYL.P.D. ..S.K.SY.S
#Mumu_X TRGP.RG.M ....SMNT. S..PL.... .PP..... .R...GPV ..S.GL.GRA .V.G.DG..G ...EPLP.R .DVYL.P.D. ..S.K.SY.S
#Cafa_X TRGP.RG.M ....SMNN. S..PL.... .PP..... .R...GPV ..S.G..GRA .V.G.DS..G ...EPLP.R .DVYL.P.D. ..S.K.SY.S
#Orna ARGP.RG.M ..S..SLNNG S..PL.... .PP..... .R...GPV ..S.G..GRA .V.G.DS..G ...EPMP.R .DVY..P.D. ..S.K.SY.S

#Hosa_YA/C RDHSSRGYRY APPSRGHAYR DYGHSSSWDE HSSRGYSYHD GYGLGRDHSE HLSGSSYRDA LQRYGTSHGA PPARGPRSYG GSTCHAYSR
#Hosa_YH .....
#Hosa_YB .....
#Hosa_YF .....
#Hosa_YJ .....
#Hosa_YD .....
#Hosa_YE .....A.....
#Bota_Y ..P...DTK. ....DY..H .....D .....H.D... ..RD..Y...R.G...S YRS..G... VSG...P... RRHYDD...
#Maeu_Y ..A..WDV...LP.EYV... ..R.. YT....DR. S..RD..Y.D .Q..GR...S YES..Y.RR. ..P...SC... .RYED...
#Hosa_X ..P...DT...P.DYT... ..R.D YP....DR. ..RD..Y.D .P..G...S YES..N.RS. ..T...P... .RYDD...
#Maeu_X ..Q...DN...P.DY... ..R.. YQ....DR. ..RD..Y.D .P..G...S YES..N.RS. ....P... .RYDD...
#Bota_X ..P...DT...P.DYT... ..R.D YP....DR. ..RD..Y.D .P..G...S YES..N.RS. ..T...P... .RYDD...
#Mumu_X .EP...DT...P.DYT... ..R.D YP....DR. ..RD..Y.D .P..G...S YES..N.RS. ..T...P... .RYDD...
#Cafa_X ..P...DT...P.DYT... ..R.D YP....DR. ..RD..Y.D .P..G...S YES..N.RS. ..T...P... .RYDD...
#Orna ..P...DT...P.DY... ..R.. YP....DR. ..RD..Y.D .P..G...S YES..N.RS. ....P... .RYDD...
```



# F SMCX/Y (SMCX/Yab)

```
#Hosa_X DFLPPEPCPV FEPSWAEFRD PLGYIAKIRP IAEKSGICKI RPPADWQPPF AVEVDNRFTP RIQLNELEAQ TRVKLNLYDQ IAKFWEIQGS SLKIPNVERR
#Mumu_X .....
#Cafa_X .....
#Feca_X .....
#Loaf_X ..... EFP.T R.A..G EKIR PIASP..... TSVY..... I..D.....
#Modo_X ..V..... ..P..... ..S.....
#Hosa_Y E..... Q..... ..V..... ..K
#Mumu_Y .....
#Cafa_Y ..... T..... D..T.....
#Feca_Y ..... T..... E.....
#Modo_Y E..... E..A.. FAF.H.... QT...V... PA..... CD..KH... ..F... ..L..C T...H...K
#Orna MRR.RHSLDS LQVTEVGG.R GQDEKPA SQN SNSDQARERA EEGE.....
```

```
#Hosa_X ILDLYSLRSL NYPPGKNIGS LLRSHYERIV YPYEMYQSGA NLVQCNT RPF DNEEKDKEYK PHSIPLRQSV QPSKFNSYGR RAKRLQPDPE PTEEDIEKNP
#Mumu_X .....
#Cafa_X .....
#Feca_X .....
#Loaf_X ..... I.....
#Modo_X ..... KI GWA.HRVTKD SCEHVG.LTL SLPGFPLLL S.Q..... S.....
#Hosa_Y ..... H..... I..... F..... H..... H..... V..... ..H.....
#Mumu_Y ..... N.. S..... I..... IF..... D..... S..R..... ..S..S..... G..... E.....
#Cafa_Y ..... A..... I..... F..... Y..... ..G..... ..T..S..S.....
#Feca_Y ..... I..... F..... H..... ..G..... ..S..S.....
#Modo_Y ..... FQ.NKM GFA...AV... HI.A.... L... NLF... S.LCLQKPNL TTDT..... D..Q... VETCPPA... MRAEAT NIKTEPGEA.
#Orna ..... TA... S.....
```

```
#Hosa_X ELKKLQIYGA GPKMMGLGLM AKDKTLRKKP TVVVKEESGG DVTMLRNHS FIESYVCRM C SRGDEDDKLL LCDGCDDNYH IFCLLPPLPE IPKGVWRCPK
#Mumu_X ..... L.....
#Cafa_X ..... L.....
#Feca_X .....
#Loaf_X ..... P..... I.....
#Modo_X ..... S..... V.P EP..... N..... A..... ..I.....
#Hosa_Y ..... P..... DKT VH.. T..D.QS GG..Q.... D..I.QV..... F..... ..R.I.....
#Mumu_Y ..... I...K ..E..... A ..I...G.ASE FG..Q.... MN..... I..... V..F..... S..... S..V.....
#Cafa_Y ..... R A.LM...PRE ..E..Q..T... DL...I..... ..T..... I..... R.....
#Feca_Y ..... LM...PRE ..G....S.N VGT...I..... V..... G..... M.....
#Modo_Y ..VRTHNLRRR MGCPVPK CEN E.EIRGTI..D ..EK..HV.E IPKS.SKSTN AVDL...LL.. GS.NDE.R... ..S... T...I...HD V...D....
#Orna ..... V..L..... D..I..... G.....
```

a ← → b

```
#Hosa_X CVMAECKRPP EAFGFEQATR EYTLQSF GEM ADSFKADYFN MPVHMVPT EL VEKEFWRLVN SIEEDVTVEY GADIHSKEFG GFPVSDNKRH LTPEEEEYAT
#Mumu_X ..... S.....
#Cafa_X ..... S.....
#Feca_X ..... S.....
#Loaf_X ..... S.....
#Modo_X ..... I..ST... SS..... A
#Hosa_Y ..IL...Q... ..Q...S..... S..... ..S..... ..NS.QN ..S...K...
#Mumu_Y ..IL...S... ..Q...S..... ..V..... ..S..... ..NNS.WD ..S...K... A
#Cafa_Y ..I..... Q..... S..... ..S..... ..SSQ.I ..S.....
#Feca_Y ..I..... Q..... ..H..... ..S..... ..SS.KN ..S.....
#Modo_Y ..LAQ..NK.Q ..... A..D...RT... ..A..S..... ..S..T..... ..A..... ..R.G.IK ..S.G...LD
#Orna ..... ..I..G..Q ..S..... A
```

```
#Hosa_X SGWNLNVMPV LEQSVLCHIN ADISGMKVPW LYVGMVFSAF CWHIEDHWSY SINYLHWGEP KTWYGVPSLA AEHLEEVMMK LTPELFDSQP DLLHQLVTLM
#Mumu_X .....
#Cafa_X .....
#Feca_X .....
#Loaf_X .....
#Modo_X ..... F.....
#Hosa_Y ..... D..... ..M.....
#Mumu_Y C..... D..... ..D...R.....
#Cafa_Y ..... D..... ..Q..... R.....
#Feca_Y ..... D..... ..Q..... R.....
#Modo_Y ..... N... M...A..T... C...L... ..C..S..... ..A.GY.. Q..D... A...V... ..I.....
#Orna ..... F..... D..... E.....
```

#Hosa\_X NPNTLMSHGV PVVRTNQAG EFVITFPYAY HSGFNQGYNF AEAVNFCTAD WLPAGRQCIE HYRRLRRYCV FSHEELICKM AACPEKLDLN LAAAVHKEMF  
#Mumu\_X .....  
#Cafa\_X .....  
#Feca\_X .....  
#Loaf\_X .....  
#Modo\_X .....A.....  
#Hosa\_Y .....F..T... ..V.....  
#Mumu\_Y .....V..... ..F..... ..V.....  
#Cafa\_Y .....F..... ..V.....  
#Feca\_Y .....I..... ..T..... ..F..... ..V.....  
#Modo\_Y .....A... ..Y..... ..F..... ..V..... ..L... ..V..... ..L..N... ..D..M... ..SKADV... ..VV ..V..ST..Q..D..A  
#Orna .....

#Hosa\_X IMVQEERRLR KALLEKGITE AEREAPELLP DDERQCICKK TTCFLSALAC YDCPDGLVCL SHINDLCKCS SSRQYLRYRY TLDELPAHLH KLKVAESFD  
#Mumu\_X .....  
#Cafa\_X .....  
#Feca\_X .....  
#Loaf\_X .....  
#Modo\_X .....A..... ..D... ..P ..T..K.....  
#Hosa\_Y .....V..... ..T..... ..I.....  
#Mumu\_Y .....T..... ..S..... ..RN..... ..Q... ..I.....  
#Cafa\_Y .....I.....  
#Feca\_Y .....R.....  
#Modo\_Y ..IED..KT... ..ETVRKL..VID ..S... ..MD..... ..M..GVS... ..SCK..GL... ..H..VE... ..S..P ..TYKYK..G... ..D..YP..MN ..A... ..L... ..YN  
#Orna .....A..... ..E... ..P ..K.....

#Hosa\_X TWANKVRVAL EVEDGRKRSL EELRALESEA RRFPNSELLQ RLKNCLSEAE ACVSRALGLV SGQEAGREAL ASLPSSPGLL QSLLERGQQL GVEVPEAQQ  
#Mumu\_X .....V..Q.....  
#Cafa\_X .....Q..... ..R.....  
#Feca\_X .....Q..... ..L.....  
#Loaf\_X .....YGSM RCWGRDSL S I I . KCYKR WTVSTGTLEI  
#Modo\_X ...SQ..A... ..L..... ..H..... ..Q... ..D... ..RR... ..R... ..SR... ..QT... ..A..L..H... ..P... ..QAHL... ..G...  
#Hosa\_Y .....F..... ..V..... ..IAQV... ..V..R... ..T..... ..R..... ..H...  
#Mumu\_Y N... ..QA... ..F..... ..K... ..T... ..I..QV... ..I ..NS..DR... ..T... ..Y..LEI... ..M..K... ..R... ..H...  
#Cafa\_Y .....F..... ..R... ..MH... ..QV... ..R... ..CP..V... ..M ..R... ..K... ..D... ..H...  
#Feca\_Y N... ..Q... ..F..... ..N... ..R... ..N... ..QV... ..I ..R... ..TL... ..P..V... ..R... ..R... ..H...  
#Modo\_Y E... ..LN..NE... ..AKINN..K... ..VNFK... ..T ..KK... ..DND... ..R ..H..RLVTQD..D ..K..A..V..QQ..L ..N..KRQTQKL... ..SEEMP..AAE... ..E... ..DVSFEF... ..D... ..L... ..QLSEM  
#Orna .....L..... ..H..D... ..S... ..TQ... ..K... ..Q..... ..DS..Q... ..EA... ..LAQ... ..PG... ..R... ..ER...

#Hosa\_X QRQVEQALDE VKRRTLAARRG LAVMRGLLVA GASVAPSPAV DKARAEQELL TIAERWEEKH LCLEARQKHP PATLEAIIHE AENIPVHLPN IQALKEALAK  
#Mumu\_X .....S..... ..I..... ..Q.....  
#Cafa\_X .....S..... ..Q..... ..R.....  
#Feca\_X .....S.....  
#Loaf\_X S..KLT... ..EL ..KR..WPSR... ..A ..... ..E..V... ..APV... ..LL... ..P..... ..R.....  
#Modo\_X KL... ..Q... ..A..P..Q... ..S ..G..T... ..A..... ..R... ..L..... ..L..... ..G...  
#Hosa\_Y ..Q..... ..QA..S..H... ..VI..Q... ..M ..KI..S... ..S... ..F..... ..R... ..T..... ..T...  
#Mumu\_Y EELL... ..Q... ..QA..SGQ..H... ..VI..KK... ..M ..TK... ..S... ..S... ..N..... ..C..... ..F... ..K... ..S... ..S... ..V... ..R... ..Y... ..S... ..T...  
#Cafa\_Y ..Q... ..D... ..KA..S... ..Q... ..VI..Q... ..T ..TKI..S... ..C... ..F..... ..R... ..D... ..D...  
#Feca\_Y ..Q... ..QA..SGK... ..VI..Q... ..S..T ..K... ..S... ..S... ..K..... ..R..... ..D... ..D...  
#Modo\_Y RIRL... ..E... ..H..ACPSSLT... ..DD... ..R..IDL... ..VGL... ..YS... ..E... ..M..R... ..VS..H..DD..R ..SLIK... ..PR..S ..LNS..A..AVK... ..I..E... ..AY... ..GL... ..D..VQ...  
#Orna R... ..IQ..G..E... ..A..P..Q... ..TS ..G..... ..E... ..L..... ..I..... ..R..... ..L.....

#Hosa\_X ARAWIADVDE IQNGDHYPCL DDLEGLVAVG RDLPGVEEL RQLELQVLT A HSWREKASKT FLKKNSCYTL LEVLCPCADA GSDSIKRSRW MEKELGLYKD  
#Mumu\_X .....T.....  
#Cafa\_X .....T.....  
#Feca\_X .....R..... ..T.....  
#Loaf\_X .....T.....  
#Modo\_X .....D..... ..E..M... ..D... ..R... ..DR...  
#Hosa\_Y ..Q... ..QA..S..H... ..VI..Q... ..M ..KI..S... ..S... ..F..... ..R... ..T..... ..A... ..Q...  
#Mumu\_Y .....N... ..E... ..N... ..K..... ..V..T... ..I... ..M...  
#Cafa\_Y ..Q... ..C... ..S... ..RM ..... ..H... ..S... ..R... ..I... ..R... ..R...  
#Feca\_Y ..Q... ..I..... ..VN... ..S... ..IG... ..R...  
#Modo\_Y ..D... ..LQE... ..EA ..L..A..GRV..V... ..ET..ME... ..SR... ..SI... ..H..NS... ..PR... ..SL..AEV ..QA..K..C..AN... ..ME... ..P..S... ..RC..V ..AVGL... ..KQR ..LKEIPSG..S  
#Orna .....E..... ..M... ..TK... ..K.....

```

#Hosa_X TELLGLSAQD LRDPGSVIVA FKEGEQKEKE GILQLRRSNS AKPSPAATSV CVCQGVPAGV ALQCDLCQDW FHGRCVSVPR LLKFLCPLCM RSRRPLETI
#Mumu_X ..... TA.I ..... T...
#Cafa_X ..... T.I ..... L.A .....
#Feca_X .....
#Loaf_X ..... I .....
#Modo_X ..... L. .... H. .A.A T. .R.PDSPS ..... A.V.E ..... R. .C. .A. .S.....
#Hosa_Y ..... P.I ..... V..... Q..... H .....
#Mumu_Y ..... M. .... E. .... H. .HI. .... N. .I .I. .... C. .... S. .... H. .... Q. .T. .H .....
#Cafa_Y ..... I ..... K. .... T. .... Q. .... H I. ....
#Feca_Y ..... T. .... L. .... H. .... SR. S. .I ..... T. .... Q. ....
#Modo_Y LSD.ERALTE SKETA.AMAT LG.ARL. .M. ALQS. .AA.E G.LLSQEIKI .L.QKA. .AP MI. .E. .R.A ..TG. .A. .S I.VW. .Y.Q ..EK.P. .K.
#Orna ..S. .... L. .... A ..C.PTSAA SCVCGQ.M.E ..... R. .G. .AP. .G.....

#Hosa_X LALLVALQRL PVRLPEGEAL QCLTERAISW QGRARQALAS EDVTALLGRL AELRQRLQAE PLREGSGKMP KVQLLENGDS VTSPEKVALD LELSSLLPQ
#Mumu_X ..... V. .... E..... SGG. .T.N. .... T. .... I...
#Cafa_X ..... P.....
#Feca_X ..... PN .....
#Loaf_X ..... R. .... H.LV. .... MPK.....
#Modo_X ..... K. .... G. .... R. .... RE. S. .... HRS .ESRDG. .E. QMP.HR. .G MKN. .... SP. .... R
#Hosa_Y ..... G. .D. .K. .... RQ. .... Q. .K .I. .... NIS ..... NM.P. ....
#Mumu_Y .S. .G. .... S. .... G. .... KQ. EKS. .Q. .D. L.T.N. .IL .EE.VL.EER IK.S. .IVP. K. .P. .S.
#Cafa_Y ..... V. .... K. .T. .Q. .... HQ. .... T. .... R. .... P. .P.V. .G TS.H. .I. .S. .V. .... S.
#Feca_Y ..... V. .... Q. G. .Q. .S. .... H. .P. .P.V. .G ..H. .P. .V. .... H
#Modo_Y .P. .AS. .I R. .... D. RYMI. .TVN. .H. .Q. .M. .S. GSLKLV.DQV GSGLLYSRWQ AAMSF. LPDW DRTY. HSPF. TGRSCIPLHE AQ. .QVS. .E
#Orna ..... K. .... T. .D. .V. .... R. .AG. .... D. .... GD ..K. .S. CNP. ..KAALENGD S.T. .ASP. .... R

#Hosa_X LTGPALPELEPE ATRAPLEELM LEGDLLLEVTL DENHSIWQLL QAGQPPDMER RLELEKAERH GSRARGRALE RRRRRKDRGG
#Mumu_X .S. .V. .... M. .... LK. Q. .... T.....
#Cafa_X .S. .V. .... M. .... L. ....
#Feca_X .S. .V. ....
#Loaf_X .S. .M. .... M. .... K. .L. .... H. .... K.....
#Modo_X .E. .V. .... .A. .V. .... M. .... R. .LP. .I. .... Q .A.G.N. .P. K. .... E.TD
#Hosa_Y .S. .V. .... .I. .... M. .... LD. .... F.HQ. .... T.S. .... Q.Q.R
#Mumu_Y .S. .V. .... M. .... Y. .... N. .NL. .H. .... P. NP .NWSEEQTP. .... Q. RVVLS
#Cafa_Y .S. .V. .D. .... V. .... R. .... L. C. .... P. HK. .... T. .... K. .... QVDL.
#Feca_Y .S. .V. .D. .... L. .... HM. .... H. HK .N.T.S.T. .K. .... Q.L.R
#Modo_Y IQEIYQT.LT KPSPTQHPDR GSPVG.TSEK N.CCRGKRDG IGNLERKLLK. .R. GSSIE LRERIKKTRT PKKKKIKDMN
#Orna .E. .V. .... TA.G. .... M. .... ARE. .LT. .... PCLILQL PRSVARAFRF GH.GFNMD.S

```







```

#Hosa_X INPIQNGQCA DSTMVDVRVM KKRAHILYEM LAGCVQRKDY TALTKFLPPK HEYVLAVRMT SISIFRVYRF GQTKPVVYR FLAQTMEDK IYDRQVTKQS
#Cafa_X ..... P.....
#Bota_X ..... P.....
#Mumu_X ..... A.....
#Loaf_X ..... P.....
#Modo_X ..... P.....N.....
#Maeu_X ..... P.....N.....
#Maeu_Y .....S.A...I...C...H.T...I...Y...V...S...F...E.....
#Orna .....N.....

```

```

#Hosa_X LSFVVVDQQQ VERHFTMNEL TELYTFEPDL LDDPNSEKKK KRDPMLPKD TILLQIHKEH IV
#Cafa_X .....
#Bota_X .....
#Mumu_X .....
#Loaf_X .....V N..ALQKHMV PG
#Modo_X .....
#Maeu_X .....
#Maeu_Y .....I...L...A...VTDA...R...Y...
#Orna .....

```
